# Supplementary material for: V-ATPase Proton Pumping Activity Is Required for Adult Zebrafish Appendage Regeneration
Source: PLoS One. 2014 Mar 26;9(3):e92594. doi: 10.1371/journal.pone.0092594 (PMC3966808; doi:10.1371/journal.pone.0092594)
Supplement: Table S1 — Ion-specific electrodes optimized to measure ion-specific flux in the adult zebrafish fin, using SIET. (XLS) [file pone.0092594.s001.xls]

## Sheet: file S1
Ion-specific electrode	Tip diameter (µm)	Ionophore collumn (µm)	Puller conditions
K+	2-3	100	Heat= 560; Pull= 1; Velocity= 29; Time=250; Pressure= 585
H+, Na+, Ca2+, Cl-	9-11	30-50	Heat= 550; Pull= 5; Velocity= 23; Time=250; Pressure= 600
